# Supplementary material for: Burden of neurological diseases in the US revealed by web searches
Source: PLoS One. 2017 May 22;12(5):e0178019. doi: 10.1371/journal.pone.0178019 (PMC5439713; doi:10.1371/journal.pone.0178019)
Supplement: S1 File — List of search terms used in this study. (XLS) [file pone.0178019.s001.xls]

## Sheet: neurological diseases
disease	abbreviation
Absence of the Septum Pellucidum
Acid Lipase Disease
Acid Maltase Deficiency
Acquired Epileptiform Aphasia
Acute Disseminated Encephalomyelitis	ADEM
Attention Deficit-Hyperactivity Disorder	ADHD
Adie's Pupil
Adie's Syndrome
Adrenoleukodystrophy
Agenesis of the Corpus Callosum
Agnosia
Aicardi Syndrome
Aicardi-Goutieres Syndrome Disorder
acquired immune deficiency syndrome - Neurological Complications	AIDS
Alexander Disease
Alpers' Disease
Alternating Hemiplegia
Alzheimer's Disease	AD
Amyotrophic Lateral Sclerosis	ALS
Anencephaly
Aneurysm
Angelman Syndrome
Angiomatosis
Anoxia
Antiphospholipid Syndrome
Aphasia
Apraxia
Arachnoid Cysts
Arachnoiditis
Arnold-Chiari Malformation
Arteriovenous Malformation
Asperger Syndrome
Ataxia
Ataxia Telangiectasia
Ataxias and Cerebellar or Spinocerebellar Degeneration
Atrial Fibrillation and Stroke
Attention Deficit-Hyperactivity Disorder
Autism Spectrum Disorder	ASD
Autonomic Dysfunction
Back Pain
Barth Syndrome
Batten Disease
Becker's Myotonia
Behcet's Disease
Bell's Palsy
Benign Essential Blepharospasm
Benign Focal Amyotrophy
Benign Intracranial Hypertension
Bernhardt-Roth Syndrome
Binswanger's Disease
Blepharospasm
Bloch-Sulzberger Syndrome
Brachial Plexus Birth Injuries
Brachial Plexus Injuries
Bradbury-Eggleston Syndrome
Brain Tumors
Spinal Tumors
Brain Aneurysm
Brain Injury
Brown-Sequard Syndrome
Bulbospinal Muscular Atrophy
Cerebral autosomal dominant arteriopathy	CADASIL
Canavan Disease
Carpal Tunnel Syndrome
Causalgia
Cavernomas
Cavernous Angioma
Cavernous Malformation
Central Cervical Cord Syndrome
Central Cord Syndrome
Central Pain Syndrome
Central Pontine Myelinolysis
Cephalic Disorders
Ceramidase Deficiency
Cerebellar Degeneration
Cerebellar Hypoplasia
Cerebral Aneurysms
Cerebral Arteriosclerosis
Cerebral Atrophy
Cerebral Beriberi
Cerebral Cavernous Malformation
Cerebral Gigantism
Cerebral Hypoxia
Cerebral Palsy
Cerebro-Oculo-Facio-Skeletal Syndrome	COFS
Charcot-Marie-Tooth Disease	CMT
Chiari Malformation
Cholesterol Ester Storage Disease
Chorea
Choreoacanthocytosis
Chronic Inflammatory Demyelinating Polyneuropathy	CIDP
Chronic Orthostatic Intolerance
Chronic Pain
Cockayne Syndrome Type II
Coffin Lowry Syndrome
Colpocephaly
Coma
Complex Regional Pain Syndrome
Congenital Facial Diplegia
Congenital Myasthenia
Congenital Myopathy
Congenital Vascular Cavernous Malformations
Corticobasal Degeneration
Cranial Arteritis
Craniosynostosis
Cree encephalitis
Creutzfeldt-Jakob Disease
Cumulative Trauma Disorders
Cushing's Syndrome
Cytomegalic Inclusion Body Disease
Cytomegalovirus Infection
Dancing Eyes-Dancing Feet Syndrome
Dandy-Walker Syndrome
Dawson Disease
De Morsier's Syndrome
Dejerine-Klumpke Palsy
Dementia
Dementia - Multi-Infarct
Dementia - Semantic
Dementia - Subcortical
Dementia With Lewy Bodies
Dentate Cerebellar Ataxia
Dentatorubral Atrophy
Dermatomyositis
Developmental Dyspraxia
Devic's Syndrome
Diabetic Neuropathy
Diffuse Sclerosis
Dravet Syndrome
Dysautonomia
Dysgraphia
Dyslexia
Dysphagia
Dyspraxia
Dyssynergia Cerebellaris Myoclonica
Dyssynergia Cerebellaris Progressiva
Dystonias
Early Infantile Epileptic Encephalopathy
Empty Sella Syndrome
Encephalitis
Encephalitis Lethargica
Encephaloceles
Encephalopathy
Encephalopathy familial infantile
Encephalotrigeminal Angiomatosis
Epilepsy
Epileptic Hemiplegia
Erb's Palsy
Erb-Duchenne and Dejerine-Klumpke Palsies
Essential Tremor
Extrapontine Myelinolysis
Fabry Disease
Fahr's Syndrome
Fainting
Familial Dysautonomia
Familial Hemangioma
Familial Idiopathic Basal Ganglia Calcification
Familial Periodic Paralyses
Familial Spastic Paralysis
Farber's Disease
Febrile Seizures
Fibromuscular Dysplasia
Fisher Syndrome
Floppy Infant Syndrome
Foot Drop
Friedreich's Ataxia
Frontotemporal Dementia
Gaucher Disease
Generalized Gangliosidoses
Gerstmann's Syndrome
Gerstmann-Straussler-Scheinker Disease
Giant Axonal Neuropathy
Giant Cell Arteritis
Giant Cell Inclusion Disease
Globoid Cell Leukodystrophy
Glossopharyngeal Neuralgia
Glycogen Storage Disease
Guillain-Barré Syndrome	GBS
Hallervorden-Spatz Disease
Head Injury
Headache
Hemicrania Continua
Hemifacial Spasm
Hemiplegia Alterans
Hereditary Neuropathies
Hereditary Spastic Paraplegia
Heredopathia Atactica Polyneuritiformis
Herpes Zoster
Herpes Zoster Oticus
Hirayama Syndrome
Holmes-Adie syndrome
Holoprosencephaly
HTLV-1 Associated Myelopathy
Hughes Syndrome
Huntington's Disease
Hydranencephaly
Hydrocephalus
Hydrocephalus - Normal Pressure
Hydromyelia
Hypercortisolism
Hypersomnia
Hypertonia
Hypotonia
Hypoxia
Immune-Mediated Encephalomyelitis
Inclusion Body Myositis	IBM
Incontinentia Pigmenti
Infantile Hypotonia
Infantile Neuroaxonal Dystrophy
Infantile Phytanic Acid Storage Disease
Infantile Refsum Disease
Infantile Spasms
Inflammatory Myopathies
Iniencephaly
Intestinal Lipodystrophy
Intracranial Cysts
Intracranial Hypertension
Isaacs' Syndrome
Joubert Syndrome
Kearns-Sayre Syndrome
Kennedy's Disease
Kinsbourne syndrome
Kleine-Levin Syndrome
Klippel-Feil Syndrome
Klippel-Trenaunay Syndrome KTS
Klüver-Bucy Syndrome
Korsakoff's Amnesic Syndrome
Krabbe Disease
Kugelberg-Welander Disease
Kuru
Lambert-Eaton Myasthenic Syndrome
Landau-Kleffner Syndrome
Lateral Femoral Cutaneous Nerve Entrapment
Lateral Medullary Syndrome
Learning Disabilities
Leigh's Disease
Lennox-Gastaut Syndrome
Lesch-Nyhan Syndrome
Leukodystrophy
Levine-Critchley Syndrome
Lewy Body Dementia
Lipid Storage Diseases
Lipoid Proteinosis
Lissencephaly
Locked-In Syndrome
Lou Gehrig's Disease
Lupus - Neurological Sequelae
Lyme Disease - Neurological Complications
Machado-Joseph Disease
Macrencephaly
Megalencephaly
Melkersson-Rosenthal Syndrome
Meningitis
Meningitis and Encephalitis
Menkes Disease
Meralgia Paresthetica
Metachromatic Leukodystrophy
Microcephaly
Migraine
Miller Fisher Syndrome
Mini Stroke
Mitochondrial Myopathy
Moebius Syndrome
Monomelic Amyotrophy
Motor Neuron Diseases	MND
Moyamoya Disease
Mucolipidoses
Mucopolysaccharidoses
Multi-Infarct Dementia
Multifocal Motor Neuropathy	MMN
Multiple Sclerosis	MS
Multiple System Atrophy
Multiple System Atrophy with Orthostatic Hypotension
Muscular Dystrophy
Myasthenia - Congenital
Myasthenia Gravis
Myelinoclastic Diffuse Sclerosis
Myoclonic Encephalopathy of Infants
Myoclonus
Myopathy
Myopathy - Congenital
Myopathy - Thyrotoxic
Myotonia
Myotonia Congenita
Narcolepsy	25-50
Neuroacanthocytosis
Neurodegeneration with Brain Iron Accumulation
Neurofibromatosis
Neuroleptic Malignant Syndrome
Neurological Complications of AIDS
Neurological Complications of Lyme Disease
Neurological Consequences of Cytomegalovirus Infection
Neurological Manifestations of Pompe Disease
Neurological Sequelae Of Lupus
Neuromyelitis Optica	NMO
Neuromyotonia
Neuronal Ceroid Lipofuscinosis
Neuronal Migration Disorders
Neuropathy - Hereditary
Neurosarcoidosis
Neurosyphilis
Neurotoxicity
Nevus Cavernosus
Niemann-Pick Disease
Normal Pressure Hydrocephalus
O'Sullivan-McLeod Syndrome
Occipital Neuralgia
Ohtahara Syndrome
Olivopontocerebellar Atrophy
Opsoclonus Myoclonus
Orthostatic Hypotension
Overuse Syndrome
Pain - Chronic
Pantothenate Kinase-Associated Neurodegeneration
Paraneoplastic Syndromes
Paresthesia
Parkinson's Disease	PD
Paroxysmal Choreoathetosis
Paroxysmal Hemicrania
Parry-Romberg
Pelizaeus-Merzbacher Disease
Pena Shokeir II Syndrome
Perineural Cysts
Periodic Paralyses
Peripheral Neuropathy
Periventricular Leukomalacia
Persistent Vegetative State
Pervasive Developmental Disorders
Phytanic Acid Storage Disease
Pick's Disease
Pinched Nerve
Piriformis Syndrome
Pituitary Tumors
Polymyositis
Pompe Disease
Porencephaly
Post-Polio Syndrome
Postherpetic Neuralgia
Postinfectious Encephalomyelitis
Postural Hypotension
Postural Orthostatic Tachycardia Syndrome
Postural Tachycardia Syndrome
Primary Dentatum Atrophy
Primary Lateral Sclerosis
Primary Progressive Aphasia
Prion Diseases
Progressive Hemifacial Atrophy
Progressive Locomotor Ataxia
Progressive Multifocal Leukoencephalopathy	PML
Progressive Sclerosing Poliodystrophy
Progressive Supranuclear Palsy	PSP
Prosopagnosia
Pseudo-Torch syndrome
Pseudotoxoplasmosis syndrome
Pseudotumor Cerebri
Psychogenic Movement
Ramsay Hunt Syndrome I
Ramsay Hunt Syndrome II
Rasmussen's Encephalitis
Reflex Sympathetic Dystrophy Syndrome
Refsum Disease
Refsum Disease - Infantile
Repetitive Motion Disorders
Repetitive Stress Injuries
Restless Legs Syndrome
Retrovirus-Associated Myelopathy
Rett Syndrome
Reye's Syndrome
Rheumatic Encephalitis
Riley-Day Syndrome
Sacral Nerve Root Cysts
Saint Vitus Dance
Salivary Gland Disease
Sandhoff Disease
Schilder's Disease
Schizencephaly
Seitelberger Disease
Seizure Disorder
Semantic Dementia
Septo-Optic Dysplasia
Severe Myoclonic Epilepsy of Infancy	SMEI
Shaken Baby Syndrome
Shingles
Shy-Drager Syndrome
Sjögren's Syndrome
Sleep Apnea
Sleeping Sickness
Sotos Syndrome
Spasticity
Spina Bifida
Spinal Cord Infarction
Spinal Cord Injury
Spinal Cord Tumors
Spinal Muscular Atrophy
Spinocerebellar Atrophy
Spinocerebellar Degeneration
Steele-Richardson-Olszewski Syndrome
Stiff-Person Syndrome
Striatonigral Degeneration
Stroke
Sturge-Weber Syndrome
Subacute Sclerosing Panencephalitis
Subcortical Arteriosclerotic Encephalopathy
SUNCT Headache
Swallowing Disorders
Sydenham Chorea
Syncope
Syphilitic Spinal Sclerosis
Syringohydromyelia
Syringomyelia
Systemic Lupus Erythematosus	SLE
Tabes Dorsalis
Tardive Dyskinesia
Tarlov Cysts
Tay-Sachs Disease
Temporal Arteritis
Tethered Spinal Cord Syndrome
Thomsen's Myotonia
Thoracic Outlet Syndrome
Thyrotoxic Myopathy
Tic Douloureux
Todd's Paralysis
Tourette Syndrome
Transient Ischemic Attack	TIA
Transmissible Spongiform Encephalopathies
Transverse Myelitis	TM
Traumatic Brain Injury
Tremor
Trigeminal Neuralgia
Tropical Spastic Paraparesis
Troyer Syndrome
Tuberous Sclerosis
Vascular Erectile Tumor
Vasculitis Syndromes of the Central and Peripheral Nervous Systems
Von Economo’s Disease
Von Hippel-Lindau Disease	VHL
Von Recklinghausen's Disease
Wallenberg's Syndrome
Werdnig-Hoffman Disease
Wernicke-Korsakoff Syndrome
West Syndrome
Whiplash
Whipple's Disease
Williams Syndrome
Wilson Disease
Wolman’s Disease
X-Linked Spinal and Bulbar Muscular Atrophy
Zellweger Syndrome

## Sheet: drugs
drug	brand name
Acetaminophen	Excedrin
acetaminophen hydrocodone	Anexsia
acetaminophen tramadol	Ultracet
Acetazolamide	Diamox
acetylsalicylic acid	Aspirin
alemtuzumab	Lemtrada
almotriptan	Axert
alteplase	Activase
Amantadine
Amitriptyline
apixaban	Eliquis
apomorphine	Apokyn
aripiprazole	Aristada
armodafinil	Nuvigil
aspirin dipyridamole	Aggrenox
atomoxetine	Strattera
Benztropine	Cogentin
botulinum toxin	Botox
botulinum toxin A	Botox
Bromfenac	Xibrom
Bromfenac	Duract
Bromocriptine	Parlodel
Bromocriptine	Cycloset
bupivacaine	Exparel
buprenorphine	Belbuca
buprenorphine naloxone	Zubsolv
Butorphanol
caprylidene	Axona
capsaicin	Qutenza
carbamazepine	Carbatrol
carbamazepine	Tegretol
Carbidopa	Lodosyn
carbidopa levodopa	Cogentin
carbidopa levodopa	Duopa
carbidopa levodopa	Rytary
Carbidopa Levodopa Entacapone
carglumic acid	Carbaglu
cariprazine	Vraylar
clobazam	Frisium
clobazam	Tapclob
clobazam	Onfi
Clonazepam	Rivotril
Clonazepam	Klonopin
clonidine	Kapvay
clopidogrel	Plavix
cyclobenzaprine	Amrix
dalfampridine	Ampyra
dexfenfluramine	Redux
dexmethylphenidate	Focalin
Dextroamphetamine Amphetamine	Adderall
dextromethorphan quinidine	Nuedexta
diclofenac	Cambia
diclofenac	Zipsor
diclofenac sodium Injection	Dyloject
difluprednate	Durezol
Dihydroergotamine	Migranal
Dimethyl fumarate	Tecfidera
divalproex sodium	Depakote
donepezil	ARICEPT
doxepin	Silenor
droxidopa	Northera
Duloxetine	Cymbalta
eletriptan	Relpax
entacapone	Comtan
Ergotamine Tartrate Caffeine
eslicarbazepine	Zebinix
eslicarbazepine	Aptiom
estrogen	Cenestin
eszopiclone	Lunesta
Ethosuximide	Emeside
Ethosuximide	Zarontin
Ethotoin	Peganone
ezogabine	Potiga
Felbamate	Felbatol
fentanyl	Lazanda
fentanyl	Onsolis
fentanyl	Subsys
fentanyl sublingual	Abstral
fingolimod	Gylenia
fospropofol	Lusedra
frovatriptan	Frova
gabapentin	Gralise
gabapentin	Neurontin
gabapentin enacarbil	Horizant
galantamine	Reminyl
glatiramer acetate	Copaxone
glycopyrrolate	Cuvposa
guanfacine	Intuniv
heparin
hydrocodone	Zohydro
Hydrocodone Acetaminophen	Vicodin
Hydrocodone Acetaminophen	Xodol
Hydrocodone Acetaminophen	Co-gesic
hydromorphone	Exalgo
indomethacin	Tivorbex
Interferon Beta 1-A	Avonex
interferon beta-1a	Rebif
interferon beta-1a Pegylated	Plegridy
Interferon beta-l b	Betaseron
Interferon beta-l b	Extavia
iodixanol	Visipaque
Iontocaine	Iomed
ketorolac	Sprix
lacosamide	Vimpat
lamotrigine	Lamictal
Levetiracetam	Desitrend
Levetiracetam	Keppra
levomilnacipran	Fetzima
lidocaine	Zingo
lidocaine	Lidoderm
Lisdexamfetamine	Vyvanse
meloxicam	Vivlodex
memantine	Namenda
Memantine	Namenda
memantine	Namzaric
meropenem	Merrem
Methamphetamine	Desoxyn
Methsuximide	Celontin
Methylergonovine	Methergine
methylphenidate	Metadate
methylphenidate	Quillivant
midazolam	Versed
mitoxantrone	Novantrone
Modafinil	Provigil
morphine	Kadian
Morphine	UltraJect
morphine	Avinza
morphine naltrexone	Embeda
naloxegol	Movantik
naltrexone	Vivitrol
Naratriptan	Amerge
natalizumab	Tysabri
nimodipine	Nymalize
Nitrazepam
Nortriptyline	Pamelor
oxcarbazepine	Oxtellar
oxcarbazepine	Trileptal
oxybate	Xyrem
oxycodone	Oxecta
oxycodone	Targiniq
oxycodone acetaminophen	Xartemis
Oxycodone Aspirin
paliperidone	Invega
peginterferon beta-1a	Plegridy
Pemoline	Cylert
perampanel	Fycompa
Phenobarbital
phenytoin	Dilantin
phenytoin	Epanutin
phenytoin	Phenytek
Piracetam	Nootropil
Piracetam	Natrol
Pramipexole	Mirapex
pregabalin	Lyrica
Primidone	Mysoline
ramelteon	Rozerem
Rasagiline	Azilect
Retigabine	Trobalt
Retigabine	Potiga
rifaximin	Xifaxan
riluzole	Rilutek
rimabotulinumtoxinB	Myobloc
rituximab	rituxan
rivastigmine	Exelon
Rizatriptan	Maxalt
ropinirole	Requip
rotigotine	Neupro
rufinamide	Inovelon
rufinamide	Banzel
Samarium Sm 153 Lexidronam	Quadramet
Selegiline	Eldepryl
Selegiline	Emsam
Selegiline	Zelapar
Sodium Oxybate	Xyrem
Stiripentol	Diacomit
sumatriptan	Imitrex
suvorexant	Belsomra
tadalafil	Cialis
tapentadol	Nucynta
tasimelteon	Hetlioz
terfiflunomide	Aubagio
tetrabenazine	Xenazine
Tiagabine	Gabitril
Ticlopidine	Ticlid
tissue plasminogen activator	tpa
tissue plasminogen activator	rtpa
tizanidine	Zanaflex
Tolcapone	Tasmar
topiramate	Qudexy
topiramate	Topamax
Tramadol	Ultram
Tramadol	ConZip
Tramadol	Ryzolt
Triazolam	Halcion
valproic	Convulex
valproic	Epilim
valproic	Epival
valproic	Episenta
valproic	Stavzor
vardenafil	Levitra
velaglucerase alfa	Vpriv
Venlafaxine	Effexor
vigabatrin	Sabril
vilazodone	Viibryd
warfarin	Coumadin
warfarin	Jantoven
zaleplon	Sonata
zinc acetate	Galzin
zolmitriptan	Zomig
zolpidem	Edluar
zolpidem	Intermezzo
zonisamide	Zonegran

## Sheet: diseases-drugs
drug	brand name	disease	disease	disease	disease	disease
Acetaminophen	Excedrin	pain
acetaminophen hydrocodone	Anexsia	pain
acetaminophen tramadol	Ultracet	pain
Acetazolamide	Diamox	Benign Intracranial Hypertension
acetylsalicylic acid	Aspirin	pain	stroke
alemtuzumab	Lemtrada	Multiple Sclerosis
almotriptan	Axert	Migraine
alteplase	Activase	stroke
Amantadine		fatigue
apixaban	Eliquis	stroke
apomorphine	Apokyn	Parkinson disease
aripiprazole	Aristada	schizophrenia	bipolar disorder	depression	Tourette syndrome	autism
armodafinil	Nuvigil	sleepiness	narcolepsy	sleep apnea
aspirin dipyridamole	Aggrenox	stroke
atomoxetine	Strattera	attention deficit hyperactivity disorder
botulinum toxin	Botox	muscle stiffness	muscle spasms	overactive bladder	migraine	hedeache
botulinum toxin A	Botox	muscle stiffness	muscle spasms	overactive bladder	migraine	hedeache
Bromfenac	Xibrom	pain
Bromfenac	Duract	pain
bupivacaine	Exparel	pain	anesthesia
buprenorphine	Belbuca	pain
buprenorphine naloxone	Zubsolv	pain
caprylidene	Axona	Alzheimer disease	dementia
capsaicin	Qutenza	pain
carbamazepine	Carbatrol	epilepsy	seizure	neuropathic pain	pain	bipolar disorder
carbamazepine	Tegretol	epilepsy	seizure	neuropathic pain	pain	bipolar disorder
carbidopa levodopa	Cogentin	Parkinson disease
carbidopa levodopa	Duopa	Parkinson disease
carbidopa levodopa	Rytary	Parkinson disease
carglumic acid	Carbaglu	hepatic encephalopathy
cariprazine	Vraylar	schizophrenia	psychosis	bipolar disease
clobazam	Frisium	Lennox-Gastaut syndrome	epilepsy	seizure
clobazam	Tapclob	Lennox-Gastaut syndrome	epilepsy	seizure
clobazam	Onfi	Lennox-Gastaut syndrome	epilepsy	seizure
Clonazepam	Rivotril	seizures	panic disorder	anxiety
Clonazepam	Klonopin	seizures	panic disorder	anxiety
clonidine	Kapvay	attention deficit hyperactivity disorder	ADHD
clopidogrel	Plavix	stroke
cyclobenzaprine	Amrix	muscle spasms
dalfampridine	Ampyra	Multiple Sclerosis
dexfenfluramine	Redux	obesity
dexmethylphenidate	Focalin	attention deficit hyperactivity disorder	ADHD
dextromethorphan quinidine	Nuedexta	Pseudobulbar syndrome
diclofenac	Cambia	pain	migraine	hedeache
diclofenac	Zipsor	pain	migraine	hedeache
diclofenac sodium Injection	Dyloject	pain	migraine	hedeache
difluprednate	Durezol	eye inflammation
Dihydroergotamine	Migranal	Migraine	hedeache
Dimethyl fumarate	Tecfidera	Multiple Sclerosis
divalproex sodium	Depakote	epilepsy	seizure	migraine	hedeache
donepezil	ARICEPT	Alzheimer disease	dementia
doxepin	Silenor	depression	sleep disorder
droxidopa	Northera	neurogenic orthostatic hypotension
eletriptan	Relpax	Migraine	hedeache
entacapone	Comtan	Parkinson disease
eslicarbazepine	Zebinix	epilepsy	seizure
eslicarbazepine	Aptiom	epilepsy	seizure
eszopiclone	Lunesta	insomnia
Ethosuximide	Emeside	epilepsy	seizure
Ethosuximide	Zarontin	epilepsy	seizure
ezogabine	Potiga	epilepsy	seizure
fentanyl	Lazanda	pain
fentanyl	Onsolis	pain
fentanyl	Subsys	pain
fentanyl sublingual	Abstral	pain
fingolimod	Gylenia	Multiple Sclerosis
fospropofol	Lusedra	anesthetic
frovatriptan	Frova	Migraine	hedeache
gabapentin	Gralise	epilepsy	seizure	shingles	pain
gabapentin	Neurontin	epilepsy	seizure	shingles	pain
gabapentin enacarbil	Horizant	epilepsy	seizure	shingles	pain
galantamine	Reminyl	Alzheimer disease	dementia
glatiramer acetate	Copaxone	Multiple Sclerosis
glycopyrrolate	Cuvposa	vagal reflexes
guanfacine	Intuniv	attention deficit hyperactivity disorder	ADHD
heparin		stroke
hydrocodone	Zohydro	pain
Hydrocodone Acetaminophen	Vicodin	pain
Hydrocodone Acetaminophen	Xodol	pain
Hydrocodone Acetaminophen	Co-gesic	pain
hydromorphone	Exalgo	pain
indomethacin	Tivorbex	pain
Interferon Beta 1-A	Avonex	Multiple Sclerosis
interferon beta-1a	Rebif	Multiple Sclerosis
interferon beta-1a Pegylated	Plegridy	Multiple Sclerosis
Interferon beta-l b	Betaseron	Multiple Sclerosis
Interferon beta-l b	Extavia	Multiple Sclerosis
iodixanol	Visipaque	contrast agent
Iontocaine	Iomed	anesthetic
ketorolac	Sprix	pain
lacosamide	Vimpat	epilepsy	seizure
lamotrigine	Lamictal	epilepsy	seizure	bipolar disorder
Levetiracetam	Desitrend	epilepsy	seizure
Levetiracetam	Keppra	epilepsy	seizure
levomilnacipran	Fetzima	depression
lidocaine	Zingo	anesthetic
lidocaine	Lidoderm	anesthetic
Lisdexamfetamine	Vyvanse	attention deficit hyperactivity disorder	ADHD	binge-eating disorder
meloxicam	Vivlodex	inflammation
memantine	Namenda	Alzheimer disease	dementia
memantine	Namzaric	Alzheimer disease	dementia
meropenem	Merrem	brain abcess
methylphenidate	Metadate	attention deficit hyperactivity disorder	ADHD	narcolepsy
methylphenidate	Quillivant	attention deficit hyperactivity disorder	ADHD	narcolepsy
midazolam	VERSED	muscle relaxant
mitoxantrone	Novantrone	Multiple Sclerosis
morphine	Kadian	pain
Morphine	UltraJect	pain
morphine	Avinza	pain
morphine naltrexone	Embeda	pain
naloxegol	Movantik	opioid-induced constipation
naltrexone	Vivitrol	drug abuse
Naratriptan	Amerge	Migraine	hedeache
natalizumab	Tysabri	Multiple Sclerosis
nimodipine	Nymalize	brain hemorrage
Nitrazepam		insomnia
oxcarbazepine	Oxtellar	epilepsy	seizure	pain
oxcarbazepine	Trileptal	epilepsy	seizure	pain
oxybate	Xyrem	narcolepsy
oxycodone	Oxecta	pain
oxycodone	Targiniq	pain
oxycodone acetaminophen	Xartemis	pain
Oxycodone Aspirin		pain
paliperidone	Invega	schizophrenia	schizoaffective disorder
peginterferon beta-1a	Plegridy	Multiple Sclerosis
Pemoline	Cylert	attention deficit hyperactivity disorder	ADHD	fatigue
perampanel	Fycompa	epilepsy	seizure
Piracetam	Nootropil	brain trauma
Piracetam	Natrol	brain damage
Phenobarbital		epilepsy	seizure
phenytoin	Dilantin	epilepsy	seizure
phenytoin	Epanutin	epilepsy	seizure
phenytoin	Phenytek	epilepsy	seizure
Pramipexole	Mirapex	Parkinson disease	restless legs syndrome
pregabalin	Lyrica	pain	fibromyalgia
Primidone	Mysoline	seizures	epilepsy
ramelteon	Rozerem	insomnia
Rasagiline	Azilect	Parkinson disease
Retigabine	Trobalt	epilepsy	seizure
Retigabine	Potiga	epilepsy	seizure
rifaximin	Xifaxan	brain abcess
riluzole	Rilutek	Amiotrophic lateral sclerosis	ALS	Lou Gehrig's disease
rimabotulinumtoxinB	Myobloc	cervical dystonia
rituximab	rituxan	Multiple Sclerosis	Neuromyelitis Optica	Chronic Inflammatory Demyelinating Polyneuropathy	CIDP
rivastigmine	Exelon	Alzheimer disease	dementia
Rizatriptan	Maxalt	migraine	hedeache
ropinirole	Requip	Parkinson disease	restless legs syndrome	Willis-Ekbom Disease
rotigotine	Neupro	Parkinson disease	restless legs syndrome	Willis-Ekbom Disease
rufinamide	Inovelon	seizures	epilepsy	Lennox-Gastaut syndrome
rufinamide	Banzel	seizures	epilepsy	Lennox-Gastaut syndrome
Samarium Sm 153 Lexidronam	Quadramet	pain	cancer
Selegiline	Eldepryl	Parkinson disease	depression
Selegiline	Emsam	Parkinson disease	depression
Selegiline	Zelapar	Parkinson disease	depression
Stiripentol	Diacomit	epilepsy	seizure	Dravet syndrome
sumatriptan	Imitrex	migraine	hedeache
suvorexant	Belsomra	insomnia
tadalafil	Cialis	erectile dysfunction
tapentadol	Nucynta	pain
tasimelteon	Hetlioz	non-24-hour sleep–wake disorder
terfiflunomide	Aubagio	Multiple Sclerosis
tetrabenazine	Xenazine	Huntington's disease	chorea
Tiagabine	Gabitril	epilepsy	seizure
Ticlopidine	Ticlid	stroke
tizanidine	Zanaflex	spasticity	muscle spasms
Tolcapone	Tasmar	Parkinson disease
topiramate	Qudexy	epilepsy	seizure	migraine	hedeache
topiramate	Topamax	epilepsy	seizure	migraine	hedeache
topiramate	Trokendi	epilepsy	seizure	migraine	hedeache
tissue plasminogen activator	tpa	stroke
tissue plasminogen activator	rtpa	stroke
valproic	Convulex	epilepsy	seizure	migraine	hedeache	bipolar disorder
valproic	Epilim	epilepsy	seizure	migraine	hedeache	bipolar disorder
valproic	Epival	epilepsy	seizure	migraine	hedeache	bipolar disorder
valproic	Episenta	epilepsy	seizure	migraine	hedeache	bipolar disorder
valproic	Stavzor	epilepsy	seizure	migraine	hedeache	bipolar disorder
vardenafil	Levitra	erectile dysfunction
velaglucerase alfa	Vpriv	type 1 Gaucher disease	Gaucher disease
vigabatrin	Sabril	epilepsy	seizure	infantile spasms
vilazodone	Viibryd	depression
warfarin	Coumadin	stroke
warfarin	Jantoven	stroke
zaleplon	Sonata	insomnia
zinc acetate	Galzin	Wilson disease
zolmitriptan	Zomig	migraine	hedeache
zolpidem	Edluar	insomnia
zolpidem	Intermezzo	insomnia
zonisamide	Zonegran	epilepsy	seizure
