# Supplementary material for: Burden of neurological diseases in the US revealed by web searches
Source: PLoS One. 2017 May 22;12(5):e0178019. doi: 10.1371/journal.pone.0178019 (PMC5439713; doi:10.1371/journal.pone.0178019)
Supplement: S2 File — Results for brain disease searches. (XLS) [file pone.0178019.s002.xls]

## Sheet: google
Disease	Avg. Monthly Searches (exact match only)	Suggested bid	Spend
Whiplash	450000	9.66	4347000
Shingles	450000	0.96	432000
MS	301000	3.29	990290
Meningitis	301000	0.71	213710
ALS	301000	1.33	400330
Multiple Sclerosis	246000	4.64	1141440
Sleep Apnea	201000	3.48	699480
Dementia	201000	1.85	371850
ADHD	201000	4.71	946710
Parkinson's Disease	165000	1.73	285450
IBM	165000	6.61	1090650
Cerebral Palsy	165000	4.42	729300
Aneurysm	165000	1.45	239250
Narcolepsy	135000	2.94	396900
Myasthenia Gravis	135000	0.47	63450
Epilepsy	135000	3.27	441450
Dyslexia	135000	2	270000
Bell's Palsy	135000	1.31	176850
AD	135000	11.34	1530900
TM	110000	2.74	301400
TIA	110000	1.25	137500
Stroke	110000	1.25	137500
Spina Bifida	110000	1.85	203500
PSP	110000	0.1	11000
Migraine	110000	3.86	424600
Huntington's Disease	110000	1.41	155100
Dysphagia	110000	1.13	124300
Ataxia	110000	1.4	154000
ASD	110000	3.21	353100
Aphasia	110000	1.86	204600
AIDS	110000	2.57	282700
Syncope	90500	0.07	6335
Muscular Dystrophy	90500	1.27	114935
Lewy Body Dementia	90500	1.62	146610
CMT	90500	1.26	114030
Alzheimer's Disease	90500	1.75	158375
Trigeminal Neuralgia	74000	3.77	278980
Peripheral Neuropathy	74000	2.7	199800
Lou Gehrig's Disease	74000	1.36	100640
Hypoxia	74000	6.4	473600
Hydrocephalus	74000	1.99	147260
Guillain-Barré Syndrome	74000	1.72	127280
Encephalitis	74000	0.57	42180
Chiari Malformation	74000	1.34	99160
Brain Aneurysm	74000	1.65	122100
Paresthesia	60500	0.84	50820
Headache	60500	5.49	332145
Encephalopathy	60500	2.32	140360
Back Pain	60500	5.41	327305
Apraxia	60500	2	121000
Williams Syndrome	49500	1.14	56430
Piriformis Syndrome	49500	0.61	30195
Pinched Nerve	49500	2.9	143550
Neurofibromatosis	49500	1.83	90585
Coma	49500	4.52	223740
Carpal Tunnel Syndrome	49500	1.79	88605
Anencephaly	49500	3.82	189090
VHL	40500	1.56	63180
Tourette Syndrome	40500	2.64	106920
Thoracic Outlet Syndrome	40500	1.28	51840
Tardive Dyskinesia	40500	3.61	146205
Orthostatic Hypotension	40500	2.2	89100
Angelman Syndrome	40500	1.89	76545
Reye's Syndrome	33100	0.41	13571
Rett Syndrome	33100	1.7	56270
Herpes Zoster	33100	1.83	60573
Dysautonomia	33100	3.01	99631
Autism Spectrum Disorder	33100	2.53	83743
Asperger Syndrome	33100	1.52	50312
Transverse Myelitis	27100	2.02	54742
Temporal Arteritis	27100	0.53	14363
Tay-Sachs Disease	27100	4.95	134145
Pseudotumor Cerebri	27100	1.93	52303
Polymyositis	27100	0.9	24390
Microcephaly	27100	1.74	47154
GBS	27100	1.69	45799
Diabetic Neuropathy	27100	1.81	49051
Dermatomyositis	27100	0.92	24932
Tremor	22200	1.51	33522
Traumatic Brain Injury	22200	4.29	95238
Systemic Lupus Erythematosus	22200	1.36	30192
SLE	22200	1.45	32190
Occipital Neuralgia	22200	2.6	57720
Myopathy	22200	0.55	12210
Dyspraxia	22200	1.27	28194
Dysgraphia	22200	1.97	43734
Cushing's Syndrome	22200	1.66	36852
Craniosynostosis	22200	2.54	56388
Batten Disease	22200	1.22	27084
Tuberous Sclerosis	18100	4.3	77830
Transient Ischemic Attack	18100	3.15	57015
Shaken Baby Syndrome	18100	1.42	25702
PD	18100	2.56	46336
Neuroleptic Malignant Syndrome	18100	39.86	721466
Myoclonus	18100	0.07	1267
Mini Stroke	18100	1.07	19367
Meralgia Paresthetica	18100	0.69	12489
Hypotonia	18100	0.57	10317
Hypersomnia	18100	10.62	192222
Dandy-Walker Syndrome	18100	2.16	39096
Creutzfeldt-Jakob Disease	18100	2.05	37105
Syringomyelia	14800	1.45	21460
Spasticity	14800	1.03	15244
Prosopagnosia	14800	0.01	148
Postherpetic Neuralgia	14800	4.72	69856
Learning Disabilities	14800	2.9	42920
Krabbe Disease	14800	1.13	16724
Essential Tremor	14800	0.81	11988
CIDP	14800	2.05	30340
Chronic Pain	14800	7.62	112776
Chorea	14800	0.82	12136
Charcot-Marie-Tooth Disease	14800	1.67	24716
Behcet's Disease	14800	0.95	14060
Attention Deficit-Hyperactivity Disorder	14800	6.57	97236
Amyotrophic Lateral Sclerosis	14800	2.32	34336
Spinal Muscular Atrophy	12100	1.41	17061
PML	12100	6.78	82038
Lissencephaly	12100	0.03	363
Kuru	12100	0.65	7865
Holoprosencephaly	12100	2.51	30371
Giant Cell Arteritis	12100	0.93	11253
Frontotemporal Dementia	12100	1.74	21054
Friedreich's Ataxia	12100	1.64	19844
Foot Drop	12100	1.81	21901
Fainting	12100	0.16	1936
Arnold-Chiari Malformation	12100	2.07	25047
Antiphospholipid Syndrome	12100	1.84	22264
ADEM	12100	1.74	21054
Wernicke-Korsakoff Syndrome	9900	1.95	19305
Spinal Cord Injury	9900	6.6	65340
Sotos Syndrome	9900	0.03	297
Restless Legs Syndrome	9900	1.51	14949
Postural Orthostatic Tachycardia Syndrome	9900	3.64	36036
Pick's Disease	9900	1.09	10791
Locked-In Syndrome	9900	0.02	198
Erb's Palsy	9900	21.5	212850
Dravet Syndrome	9900	1.79	17721
Complex Regional Pain Syndrome	9900	6.72	66528
Blepharospasm	9900	2.49	24651
Sleeping Sickness	8100	0.72	5832
Sjögren's Syndrome	8100	1.89	15309
Pompe Disease	8100	1.34	10854
Normal Pressure Hydrocephalus	8100	5.99	48519
Multiple System Atrophy	8100	1.82	14742
Moebius Syndrome	8100	1.21	9801
Infantile Spasms	8100	1.38	11178
Arachnoiditis	8100	0.77	6237
Wilson Disease	6600	0.3	1980
Progressive Supranuclear Palsy	6600	0.08	528
NMO	6600	3.66	24156
Lennox-Gastaut Syndrome	6600	3.4	22440
Klippel-Feil Syndrome	6600	0.25	1650
Intracranial Hypertension	6600	9.22	60852
Head Injury	6600	3.53	23298
Gaucher Disease	6600	4.35	28710
Fibromuscular Dysplasia	6600	1.58	10428
Fabry Disease	6600	0.85	5610
Dementia With Lewy Bodies	6600	1.67	11022
Brown-Sequard Syndrome	6600	1.15	7590
Autonomic Dysfunction	6600	1.62	10692
Ataxia Telangiectasia	6600	2.24	14784
Arteriovenous Malformation	6600	2.96	19536
Agenesis of the Corpus Callosum	6600	1.44	9504
Sturge-Weber Syndrome	5400	1.73	9342
Stiff-Person Syndrome	5400	0.7	3780
Shy-Drager Syndrome	5400	0.83	4482
Schizencephaly	5400	0.05	270
Postural Hypotension	5400	5.9	31860
Post-Polio Syndrome	5400	0.09	486
Neurosyphilis	5400	0.16	864
Neuromyelitis Optica	5400	2.74	14796
Leukodystrophy	5400	1.7	9180
Inclusion Body Myositis	5400	1.77	9558
Brain Tumors	5400	2.77	14958
Adrenoleukodystrophy	5400	3.17	17118
Zellweger Syndrome	4400	1.28	5632
Tic Douloureux	4400	1.78	7832
Septo-Optic Dysplasia	4400	1.51	6644
Neurosarcoidosis	4400	0.56	2464
Myotonia	4400	1.04	4576
MMN	4400	0.25	1100
Miller Fisher Syndrome	4400	0.49	2156
Menkes Disease	4400	0.51	2244
Kleine-Levin Syndrome	4400	0.12	528
Joubert Syndrome	4400	1.25	5500
Hypertonia	4400	0.55	2420
Glycogen Storage Disease	4400	3.17	13948
Empty Sella Syndrome	4400	0.05	220
Central Cord Syndrome	4400	1.94	8536
CADASIL	4400	0.3	1320
Brain Injury	4400	4.83	21252
Aicardi Syndrome	4400	1.22	5368
Tabes Dorsalis	3600	0.08	288
Seizure Disorder	3600	2.45	8820
Moyamoya Disease	3600	1.12	4032
Hemicrania Continua	3600	0.02	72
Chronic Inflammatory Demyelinating Polyneuropathy	3600	2.68	9648
Causalgia	3600	1.6	5760
Canavan Disease	3600	2.95	10620
Whipple's Disease	2900	1.57	4553
West Syndrome	2900	1.07	3103
Sydenham Chorea	2900	0.12	348
Primary Progressive Aphasia	2900	0.77	2233
MND	2900	2.33	6757
Mitochondrial Myopathy	2900	1.58	4582
Incontinentia Pigmenti	2900	2.09	6061
Hemifacial Spasm	2900	2.19	6351
Febrile Seizures	2900	8.86	25694
Encephalitis Lethargica	2900	1.1	3190
Corticobasal Degeneration	2900	1.76	5104
Von Hippel-Lindau Disease	2400	1.07	2568
Progressive Multifocal Leukoencephalopathy	2400	0.03	72
Niemann-Pick Disease	2400	5.98	14352
Neurotoxicity	2400	3.21	7704
Metachromatic Leukodystrophy	2400	3.79	9096
Landau-Kleffner Syndrome	2400	2.07	4968
Hughes Syndrome	2400	2.54	6096
Familial Dysautonomia	2400	1.86	4464
Cavernous Malformation	2400	1.33	3192
Primary Lateral Sclerosis	1900	1.68	3192
Multi-Infarct Dementia	1900	2.09	3971
Leigh's Disease	1900	1.59	3021
Hypercortisolism	1900	3.19	6061
Hereditary Spastic Paraplegia	1900	1.68	3192
Glossopharyngeal Neuralgia	1900	1.92	3648
Cerebral Hypoxia	1900	0.99	1881
Cerebral Atrophy	1900	1.31	2489
Cavernous Angioma	1900	2.12	4028
Postural Tachycardia Syndrome	1600	3.85	6160
Pituitary Tumors	1600	3.13	5008
Myotonia Congenita	1600	2.45	3920
Melkersson-Rosenthal Syndrome	1600	2.74	4384
Lateral Medullary Syndrome	1600	0.02	32
Kennedy's Disease	1600	0.79	1264
Barth Syndrome	1600	1.36	2176
Alexander Disease	1600	1.88	3008
Acute Disseminated Encephalomyelitis	1600	1.42	2272
Saint Vitus Dance	1300	0.05	65
Multifocal Motor Neuropathy	1300	7.28	9464
Kearns-Sayre Syndrome	1300	2.53	3289
Coffin Lowry Syndrome	1300	1.62	2106
Benign Intracranial Hypertension	1300	2.01	2613
Syringohydromyelia	1000	1.29	1290
Swallowing Disorders	1000	1.8	1800
Riley-Day Syndrome	1000	2.8	2800
Porencephaly	1000	2.58	2580
Machado-Joseph Disease	1000	3.83	3830
Central Pain Syndrome	1000	3.09	3090
Sandhoff Disease	880	2.11	1856.8
Reflex Sympathetic Dystrophy Syndrome	880	3.42	3009.6
Prion Diseases	880	1.7	1496
Semantic Dementia	720	1.17	842.4
Cerebellar Degeneration	720	0.56	403.2
Alpers' Disease	720	2.32	1670.4
Tarlov Cysts	590	0.1	59
Spinocerebellar Degeneration	590	0.62	365.8
Congenital Myopathy	590	0.58	342.2
Spinal Tumors	480	1.68	806.4
Acid Maltase Deficiency	480	1.4	672
Spinal Cord Infarction	390	0.32	124.8
Pervasive Developmental Disorders	390	0.02	7.8
Herpes Zoster Oticus	390	2.55	994.5
Fahr's Syndrome	390	0.48	187.2
Dystonias	390	1.45	565.5
Benign Essential Blepharospasm	390	3.16	1232.4
Neuroacanthocytosis	320	1.46	467.2
Cytomegalovirus Infection	320	4.5	1440
Cerebral Cavernous Malformation	320	2.27	726.4
Arachnoid Cysts	320	0.71	227.2
Tethered Spinal Cord Syndrome	260	2.6	676
Schilder's Disease	260	2.64	686.4
Monomelic Amyotrophy	260	1.69	439.4
Inflammatory Myopathies	260	3.03	787.8
Giant Axonal Neuropathy	260	2.93	761.8
Devic's Syndrome	260	0.48	124.8
Developmental Dyspraxia	260	2.83	735.8
Cranial Arteritis	260	0.27	70.2
Spinal Cord Tumors	210	2.34	491.4
Perineural Cysts	210	0.32	67.2
Motor Neuron Diseases	210	1.75	367.5
Meningitis and Encephalitis	210	0.76	159.6
Cavernomas	210	6.7	1407
Spinocerebellar Atrophy	170	1.34	227.8
Cumulative Trauma Disorders	170	2.57	436.9
Bernhardt-Roth Syndrome	170	0.03	5.1
Atrial Fibrillation and Stroke	170	13.07	2221.9
Salivary Gland Disease	110	1.1	121
Cerebral Aneurysms	110	2.03	223.3
Globoid Cell Leukodystrophy	90	2.37	213.3
Steele-Richardson-Olszewski Syndrome	50	0.09	4.5
Diffuse Sclerosis	50	0.13	6.5
Neuropathy - Hereditary	30	0.52	15.6
Bulbospinal Muscular Atrophy	30	1.82	54.6
Pain - Chronic	20	4.26	85.2
Dementia - Semantic	10	0.62	6.2
Dementia - Multi-Infarct	10	5.52	55.2

## Sheet: Bing Yahoo
Disease	Average monthly searches	Suggested bid
adhd	100250	2.75
ms	99670	1.77
shingles	82570	0.7
psp	82520	0.19
multiple sclerosis	61280	1.53
sleep apnea	61230	1.05
dementia	53600	0.78
ad	51140	0.35
ibm	46630	0.42
asperger syndrome	44490	0.09
als	42050	0.06
parkinson's disease	38700	0.4
meningitis	35430	2.72
whiplash	34810	0.69
back pain	32330	1.23
cmt	32230	0.15
alzheimer's disease	30000	0.46
bell's palsy	29700	0.2
myasthenia gravis	27220	0.18
tm	27100	1.35
asd	26290	0.16
aneurysm	25480	0.13
cerebral palsy	25400	2.78
lewy body dementia	25240	0.24
huntington's disease	24580	0.29
stroke	23620	0.51
dyslexia	23010	0.38
tia	21730	0.11
dysphagia	19520	0.1
migraine	19490	2.23
narcolepsy	19250	0.2
ataxia	18870	0.1
epilepsy	18710	1.25
guillain-barré syndrome	18650	0.1
spina bifida	17100	0.39
aphasia	17080	0.1
chronic pain	17020	2.48
aids	15530	0.88
syncope	15300	0.06
headache	14950	1.47
peripheral neuropathy	14870	0.49
trigeminal neuralgia	14380	1.21
muscular dystrophy	13170	0.27
chiari malformation	12800	0.19
encephalitis	12360	0.12
paresthesia	12070	0.13
lou gehrig's disease	12000	0.06
hydrocephalus	11830	0.28
encephalopathy	11710	0.08
piriformis syndrome	11560	0.1
vhl	10620	0.05
hypoxia	10530	0.07
sjögren's syndrome	10500	0.06
apraxia	10230	0.14
brain aneurysm	10140	0.13
neurofibromatosis	9590	0.23
cushing's syndrome	9560	0.08
tourette syndrome	9520	0.3
williams syndrome	8240	0.07
microcephaly	8100	0.09
thoracic outlet syndrome	7890	0.06
pd	7690	1.08
diabetic neuropathy	7620	1.5
herpes zoster	7610	1.07
angelman syndrome	7400	0.07
coma	7390	0.13
autism spectrum disorder	7290	0.26
temporal arteritis	7240	0.06
carpal tunnel syndrome	7140	0.59
rett syndrome	7030	0.11
sle	6990	0.71
tardive dyskinesia	6830	0.09
anencephaly	6750	0.1
orthostatic hypotension	6390	0.07
dermatomyositis	6260	0.12
restless legs syndrome	6230	0.73
dysautonomia	5950	0.08
learning disabilities	5860	0.7
wilson disease	5800	0.14
reye's syndrome	5670	0.06
pinched nerve	5460	0.45
systemic lupus erythematosus	5380	1.09
polymyositis	5380	0.08
transverse myelitis	5300	0.17
batten disease	4700	0.06
pseudotumor cerebri	4500	0.13
occipital neuralgia	4450	0.46
tay-sachs disease	4340	0.2
myopathy	4250	0.07
gbs	4240	0.25
dysgraphia	4200	0.11
dandy-walker syndrome	4050	0.07
brain injury	3980	1.37
meralgia paresthetica	3970	0.06
traumatic brain injury	3960	1.11
craniosynostosis	3820	0.54
transient ischemic attack	3640	0.15
tuberous sclerosis	3550	1.08
myoclonus	3410	0.09
behcet's disease	3390	0.06
dyspraxia	3370	0.32
tremor	3200	0.1
essential tremor	3160	0.37
postherpetic neuralgia	3150	2.21
creutzfeldt-jakob disease	3130	0.1
syringomyelia	3040	0.09
neuroleptic malignant syndrome	3010	0.1
attention deficit-hyperactivity disorder	2980	3.15
hypotonia	2790	0.1
hypersomnia	2770	0.12
adem	2720	0.02
krabbe disease	2710	0.11
cidp	2690	1.08
pick's disease	2680	0.08
complex regional pain syndrome	2590	0.46
mini stroke	2580	0.34
foot drop	2570	0.72
antiphospholipid syndrome	2560	0.07
arnold-chiari malformation	2540	0.09
agnosia	2520	0.09
giant cell arteritis	2490	0.08
friedreich's ataxia	2430	0.06
shaken baby syndrome	2410	0.27
multiple system atrophy	2330	0.09
frontotemporal dementia	2290	0.09
chorea	2290	0.29
spasticity	2270	0.67
sotos syndrome	2260	0.13
gaucher disease	2250	1.45
erb's palsy	2190	4.74
amyotrophic lateral sclerosis	2130	1.05
pml	2090	0.04
fainting	2090	0.08
moyamoya disease	2050	0.37
arachnoiditis	2040	0.08
holoprosencephaly	1950	0.06
fabry disease	1940	0.05
spinal muscular atrophy	1870	0.86
brain tumors	1850	0.64
blepharospasm	1840	0.31
spinal cord injury	1820	1.22
wernicke-korsakoff syndrome	1810	0.07
kuru	1810	0.43
charcot-marie-tooth disease	1800	0.2
lissencephaly	1770	0
dementia with lewy bodies	1760	0.1
postural orthostatic tachycardia syndrome	1750	0.17
sturge-weber syndrome	1740	0.22
anoxia	1720	0.11
inclusion body myositis	1710	0.13
progressive supranuclear palsy	1700	0.16
dravet syndrome	1700	0.13
normal pressure hydrocephalus	1660	0.08
pompe disease	1620	0.11
lennox-gastaut syndrome	1600	0.37
febrile seizures	1560	0.06
agenesis of the corpus callosum	1440	0.12
prosopagnosia	1430	0.09
brown-sequard syndrome	1340	0.06
autonomic dysfunction	1340	0.07
shy-drager syndrome	1320	0.1
moebius syndrome	1320	0.13
mmn	1310	0
locked-in syndrome	1310	0.23
head injury	1280	0.73
nmo	1270	0.06
stiff-person syndrome	1220	0.06
whipple's disease	1210	0.07
klippel-feil syndrome	1190	0.2
arteriovenous malformation	1190	1.43
post-polio syndrome	1170	0.06
neuromyelitis optica	1150	0.19
schizencephaly	1130	0.01
sleeping sickness	1100	0.07
seizure disorder	1100	0.38
intracranial hypertension	1100	0.08
infantile spasms	1070	0.63
fibromuscular dysplasia	1050	0.06
menkes disease	1040	0.11
leukodystrophy	1040	0.08
neurosyphilis	980	0
mnd	980	0.08
joubert syndrome	960	0.25
neurosarcoidosis	950	0.09
aicardi syndrome	950	0.07
empty sella syndrome	940	0.05
todd's paralysis	930	0
septo-optic dysplasia	900	0.08
ataxia telangiectasia	900	0.09
adrenoleukodystrophy	870	0.09
central cord syndrome	860	0.23
cadasil	860	0.05
atrial fibrillation and stroke	860	3.38
niemann-pick disease	820	0.09
postural hypotension	810	0.07
miller fisher syndrome	810	0.55
wallenberg's syndrome	780	0.06
von hippel-lindau disease	770	0.1
corticobasal degeneration	770	0.06
hypertonia	740	0
hydranencephaly	740	0
chronic inflammatory demyelinating polyneuropathy	730	2.46
periventricular leukomalacia	720	0
sydenham chorea	700	0
primary progressive aphasia	700	0.14
mitochondrial myopathy	700	0.12
multi-infarct dementia	680	0.11
canavan disease	660	0.12
causalgia	650	0.06
lesch-nyhan syndrome	640	0.24
glycogen storage disease	640	0.08
kleine-levin syndrome	630	0.06
zellweger syndrome	610	0
tic douloureux	610	0.12
myotonia	610	0.06
hemicrania continua	580	0.05
cerebral atrophy	580	0.07
werdnig-hoffman disease	570	0
kennedy's disease	570	0.09
hemifacial spasm	560	0.41
central pontine myelinolysis	560	0
cavernous malformation	560	0.24
swallowing disorders	550	0.12
primary lateral sclerosis	550	0.12
cerebellar hypoplasia	550	0.05
leigh's disease	530	0.07
alexander disease	510	0.08
west syndrome	470	0.53
pituitary tumors	470	0.57
incontinentia pigmenti	440	0.07
hereditary spastic paraplegia	440	0.16
glossopharyngeal neuralgia	440	0.11
tabes dorsalis	430	0
cavernous angioma	420	0.14
progressive multifocal leukoencephalopathy	400	0
landau-kleffner syndrome	390	0.05
hughes syndrome	390	0.07
adie's pupil	380	0
von recklinghausen's disease	370	0
isaacs' syndrome	370	0.16
klüver-bucy syndrome	360	0
familial dysautonomia	360	0.34
metachromatic leukodystrophy	350	0.09
colpocephaly	350	0
binswanger's disease	350	0
multifocal motor neuropathy	320	0.46
postural tachycardia syndrome	310	0.16
coffin lowry syndrome	310	0.05
acute disseminated encephalomyelitis	310	0.05
persistent vegetative state	300	0
myotonia congenita	300	0
kearns-sayre syndrome	290	0
gerstmann's syndrome	290	0
encephalitis lethargica	290	0.04
tarlov cysts	270	0.06
pervasive developmental disorders	270	0
neurotoxicity	270	0
ohtahara syndrome	260	0
machado-joseph disease	260	0.16
lambert-eaton myasthenic syndrome	250	0
barth syndrome	250	0.18
saint vitus dance	240	0.05
melkersson-rosenthal syndrome	240	0
syringohydromyelia	230	0.01
rasmussen's encephalitis	230	0
hypercortisolism	230	0.41
hydromyelia	230	0
benign intracranial hypertension	230	0
reflex sympathetic dystrophy syndrome	220	0.1
porencephaly	220	0
paroxysmal hemicrania	210	0.05
meningitis and encephalitis	210	0.05
cerebellar degeneration	210	0.05
central pain syndrome	210	0.06
pelizaeus-merzbacher disease	190	0
spinal tumors	180	0.07
sandhoff disease	180	0.05
lateral medullary syndrome	180	0
neuromyotonia	170	0
fahr's syndrome	170	0
cytomegalovirus infection	170	0.29
semantic dementia	160	0.1
riley-day syndrome	160	0
olivopontocerebellar atrophy	160	0
devic's syndrome	160	0
cerebral hypoxia	150	0
alpers' disease	150	0.07
spinocerebellar degeneration	140	0.07
subacute sclerosing panencephalitis	130	0
tethered spinal cord syndrome	120	0
spinal cord infarction	120	0.16
refsum disease	120	0
prion diseases	120	0.07
opsoclonus myoclonus	120	0
congenital myopathy	120	0
adie's syndrome	120	0
cerebral arteriosclerosis	110	0
cerebral aneurysms	110	0.11
wolman's disease	100	0
paraneoplastic syndromes	100	0
arachnoid cysts	100	0.05
megalencephaly	90	0
herpes zoster oticus	90	0
de morsier's syndrome	90	0
angiomatosis	90	0
parry-romberg	80	0
overuse syndrome	80	0
developmental dyspraxia	80	0.28
cranial arteritis	80	0.06
schilder's disease	70	0
perineural cysts	70	0
neuronal ceroid lipofuscinosis	70	0
neuroacanthocytosis	70	0
inflammatory myopathies	70	0
dystonias	70	0.05
cofs	70	0
cerebral cavernous malformation	70	0.1
brachial plexus injuries	70	0
benign essential blepharospasm	70	0.17
acid maltase deficiency	70	0.18
tropical spastic paraparesis	60	0
spinocerebellar atrophy	60	0.09
spinal cord tumors	60	0.06
motor neuron diseases	60	0.12
monomelic amyotrophy	60	0
kugelberg-welander disease	60	0
iniencephaly	60	0
giant axonal neuropathy	60	0
sunct headache	50	0
smei	50	0
mucopolysaccharidoses	50	0
lateral femoral cutaneous nerve entrapment	50	0
infantile neuroaxonal dystrophy	50	0
hallervorden-spatz disease	50	0
fisher syndrome	50	0
farber's disease	50	0
cavernomas	50	0
transmissible spongiform encephalopathies	40	0
striatonigral degeneration	40	0
salivary gland disease	40	0.07
repetitive stress injuries	40	0.16
neuropathy - hereditary	40	0.09
holmes-adie syndrome	40	0
gerstmann-straussler-scheinker disease	40	0
cumulative trauma disorders	40	0.65
bernhardt-roth syndrome	40	0
alternating hemiplegia	40	0
absence of the septum pellucidum	40	0
thyrotoxic myopathy	30	0
steele-richardson-olszewski syndrome	30	0
lipoid proteinosis	30	0
infantile refsum disease	30	0
globoid cell leukodystrophy	30	0
floppy infant syndrome	30	0
diffuse sclerosis	30	0.06
congenital myasthenia	30	0
cerebral gigantism	30	0
bradbury-eggleston syndrome	30	0
troyer syndrome	20	0
sacral nerve root cysts	20	0
paroxysmal choreoathetosis	20	0
pantothenate kinase-associated neurodegeneration	20	0
pain - chronic	20	0.16
neurodegeneration with brain iron accumulation	20	0
lipid storage diseases	20	0
infantile hypotonia	20	0
hydrocephalus - normal pressure	20	0
extrapontine myelinolysis	20	0
encephaloceles	20	0
early infantile epileptic encephalopathy	20	0
dawson disease	20	0
cephalic disorders	20	0
bloch-sulzberger syndrome	20	0
x-linked spinal and bulbar muscular atrophy	10	0
von economo's disease	10	0
vascular erectile tumor	10	0
subcortical arteriosclerotic encephalopathy	10	0
severe myoclonic epilepsy of infancy	10	0
seitelberger disease	10	0
rheumatic encephalitis	10	0
repetitive motion disorders	10	0
ramsay hunt syndrome ii	10	0
ramsay hunt syndrome i	10	0
psychogenic movement	10	0
pseudo-torch syndrome	10	0
progressive locomotor ataxia	10	0
progressive hemifacial atrophy	10	0
primary dentatum atrophy	10	0
postinfectious encephalomyelitis	10	0
phytanic acid storage disease	10	0
o'sullivan-mcleod syndrome	10	0
nevus cavernosus	10	0
neuronal migration disorders	10	0
neurological sequelae of lupus	10	0
neurological complications of lyme disease	10	0
neurological complications of aids	10	0
myopathy - congenital	10	0
myoclonic encephalopathy of infants	10	0
myelinoclastic diffuse sclerosis	10	0
myasthenia - congenital	10	0
multiple system atrophy with orthostatic hypotension	10	0
mucolipidoses	10	0
macrencephaly	10	0
lyme disease - neurological complications	10	0
lupus - neurological sequelae	10	0
levine-critchley syndrome	10	0
korsakoff's amnesic syndrome	10	0
klippel-trenaunay syndrome kts	10	0
kinsbourne syndrome	10	0
intracranial cysts	10	0
intestinal lipodystrophy	10	0
immune-mediated encephalomyelitis	10	0
htlv-1 associated myelopathy	10	0
hirayama syndrome	10	0
heredopathia atactica polyneuritiformis	10	0
hereditary neuropathies	10	0
giant cell inclusion disease	10	0
familial spastic paralysis	10	0
familial idiopathic basal ganglia calcification	10	0
familial hemangioma	10	0
erb-duchenne and dejerine-klumpke palsies	10	0
epileptic hemiplegia	10	0
encephalotrigeminal angiomatosis	10	0
dyssynergia cerebellaris progressiva	10	0
dyssynergia cerebellaris myoclonica	10	0
dentatorubral atrophy	10	0
dentate cerebellar ataxia	10	0
dementia - subcortical	10	0
dementia - semantic	10	0
dementia - multi-infarct	10	0
dejerine-klumpke palsy	10	0
dancing eyes-dancing feet syndrome	10	0
cytomegalic inclusion body disease	10	0
cree encephalitis	10	0
congenital facial diplegia	10	0
cockayne syndrome type ii	10	0
chronic orthostatic intolerance	10	0
choreoacanthocytosis	10	0
cholesterol ester storage disease	10	0
cerebro-oculo-facio-skeletal syndrome	10	0
cerebral beriberi	10	0
cerebral autosomal dominant arteriopathy	10	0
ceramidase deficiency	10	0
central cervical cord syndrome	10	0
bulbospinal muscular atrophy	10	0
brachial plexus birth injuries	10	0
benign focal amyotrophy	10	0
becker's myotonia	10	0
ataxias and cerebellar or spinocerebellar degeneration	10	0
aicardi-goutieres syndrome disorder	10	0
acquired epileptiform aphasia	10	0
acid lipase disease	10	0
vasculitis syndromes of the central and peripheral nervous systems	0	0
thomsen's myotonia	0	0
syphilitic spinal sclerosis	0	0
retrovirus-associated myelopathy	0	0
refsum disease - infantile	0	0
pseudotoxoplasmosis syndrome	0	0
progressive sclerosing poliodystrophy	0	0
periodic paralyses	0	0
pena shokeir ii syndrome	0	0
neurological manifestations of pompe disease	0	0
neurological consequences of cytomegalovirus infection	0	0
myopathy - thyrotoxic	0	0
infantile phytanic acid storage disease	0	0
hemiplegia alterans	0	0
generalized gangliosidoses	0	0
familial periodic paralyses	0	0
encephalopathy familial infantile	0	0
congenital vascular cavernous malformations	0	0
acquired immune deficiency syndrome - neurological complications	0	0
