# Supplementary material for: Burden of neurological diseases in the US revealed by web searches
Source: PLoS One. 2017 May 22;12(5):e0178019. doi: 10.1371/journal.pone.0178019 (PMC5439713; doi:10.1371/journal.pone.0178019)
Supplement: S3 File — Results for CNS drug searches. (XLS) [file pone.0178019.s003.xls]

## Sheet: google
Drug	Disease	Avg. Monthly Searches (exact match only)	Suggested bid	Spend
gabapentin	epilepsy,seizure,shingles,pain,	450000	1.57	706500
cyclobenzaprine	muscle spasms	368000	6.32	2325760
hydrocodone	pain	368000	4.65	1.7112e+06
meloxicam	inflammation	301000	0.25	75250
oxycodone	pain	301000	3.08	927080
Acetaminophen	pain	246000	1.24	305040
Clonazepam	seizures,panic disorder,anxiety	246000	6.3	1549800
clonidine	attention deficit hyperactivity disorder,ADHD	165000	0.08	13200
diclofenac	pain,migraine,hedeache	165000	0.35	57750
tizanidine	spasticity,muscle spasms	135000	5.94	801900
fentanyl	pain	110000	5.06	556600
zolpidem	insomnia	110000	3.21	353100
clopidogrel	stroke	90500	3.37	304985
lamotrigine	epilepsy,seizure,bipolar disorder	90500	2.64	238920
lidocaine	anesthetic	90500	0.46	41630
methylphenidate	attention deficit hyperactivity disorder,ADHD,narcolepsy	90500	0.3	27150
morphine	pain	90500	2.04	184620
topiramate	epilepsy,seizure,migraine,hedeache,	90500	2.14	193670
donepezil	Alzheimer disease,dementia	74000	3.15	233100
indomethacin	pain	74000	2.92	216080
naltrexone	drug abuse	74000	3.96	293040
buprenorphine	pain	60500	2.74	165770
carbamazepine	epilepsy,seizure,neuropathic pain,pain,bipolar disorder	60500	4.06	245630
doxepin	depression,sleep disorder	60500	0.96	58080
heparin	stroke	60500	0.61	36905
hydromorphone	pain	60500	0.2	12100
ketorolac	pain	60500	0.48	29040
sumatriptan	Migraine,hedeache	60500	5.98	361790
warfarin	stroke	60500	2.45	148225
Levetiracetam	epilepsy,seizure	49500	3.67	181665
Phenobarbital	epilepsy,seizure	49500	0.81	40095
capsaicin	pain	40500	0.37	14985
guanfacine	attention deficit hyperactivity disorder,ADHD	40500	0.14	5670
Hydrocodone Acetaminophen	pain	40500	1.66	67230
oxcarbazepine	epilepsy,seizure,pain	40500	7.01	283905
ropinirole	Parkinson disease,restless legs syndrome,Willis-Ekbom Disease	40500	2.27	91935
aripiprazole	schizophrenia ,bipolar disorder,depression, Tourette syndrome,autism	33100	3.71	122801
midazolam	muscle relaxant	33100	0.01	331
phenytoin	epilepsy,seizure	33100	1.68	55608
Pramipexole	Parkinson disease,restless legs syndrome	33100	2.15	71165
Acetazolamide	Benign Intracranial Hypertension	27100	0.5	13550
apixaban	stroke	27100	0.11	2981
Primidone	seizures,epilepsy	27100	1.69	45799
tadalafil	erectile dysfunction	27100	1.28	34688
memantine	Alzheimer disease,dementia	22200	4.49	99678
Piracetam	brain trauma	22200	0.39	8658
Piracetam	brain damage	22200	0.39	8658
pregabalin	pain,fibromyalgia	22200	2.52	55944
rifaximin	brain abcess	22200	1.28	28416
eszopiclone	insomnia	18100	2.58	46698
glycopyrrolate	vagal reflexes	18100	0.32	5792
meropenem	brain abcess	18100	0.02	362
rituximab	Multiple Sclerosis,Neuromyelitis Optica,Chronic Inflammatory Demyelinating Polyneuropathy,CIDP,	18100	0.9	16290
Rizatriptan	Migraine,hedeache	18100	8.7	157470
zonisamide	epilepsy,seizure	18100	1.63	29503
zaleplon	insomnia	14800	4.27	63196
acetylsalicylic acid	pain,stroke	12100	0.16	1936
galantamine	Alzheimer disease,dementia	12100	0.36	4356
atomoxetine	attention deficit hyperactivity disorder	9900	2.72	26928
botulinum toxin	muscle stiffness,muscle spasms,overactive bladder,migraine,hedeache	9900	8.35	82665
bupivacaine	pain,anesthesia	9900	2.91	28809
dexmethylphenidate	attention deficit hyperactivity disorder,ADHD	9900	0.63	6237
divalproex sodium	epilepsy,seizure,migraine,hedeache,	9900	1.25	12375
rivastigmine	Alzheimer disease,dementia	9900	0.26	2574
Selegiline	Parkinson disease,depression	9900	0.3	2970
alteplase	stroke	8100	1.61	13041
tapentadol	pain	8100	0.49	3969
vardenafil	erectile dysfunction	8100	0.7	5670
armodafinil	sleepiness ,narcolepsy,sleep apnea	6600	1.56	10296
Lisdexamfetamine	attention deficit hyperactivity disorder,ADHD,binge-eating disorder	6600	0.47	3102
riluzole	Amiotrophic lateral sclerosis,ALS,Lou Gehrig's disease	6600	1.51	9966
nimodipine	brain hemorrage	5400	0.54	2916
ramelteon	insomnia	5400	5.54	29916
vilazodone	depression	5400	0.22	1188
clobazam	Lennox-Gastaut syndrome,epilepsy,seizure	4400	2.93	12892
entacapone	Parkinson disease	4400	2.08	9152
Naratriptan	Migraine,hedeache	4400	11.29	49676
paliperidone	schizophrenia ,schizoaffective disorder	4400	2.43	10692
suvorexant	insomnia	4400	2.74	12056
zolmitriptan	Migraine,hedeache	4400	5.97	26268
Ethosuximide	epilepsy,seizure	3600	3.04	10944
natalizumab	Multiple Sclerosis	3600	8.57	30852
Ticlopidine	stroke	3600	1.92	6912
zinc acetate	Wilson disease	3600	1.84	6624
alemtuzumab	Multiple Sclerosis	2900	6.23	18067
mitoxantrone	Multiple Sclerosis	2900	2.98	8642
Dimethyl fumarate	Multiple Sclerosis	2400	14.07	33768
fingolimod	Multiple Sclerosis	2400	5.67	13608
Rasagiline	Parkinson disease	2400	0.91	2184
tissue plasminogen activator	stroke	2400	12.06	28944
naloxegol	opioid-induced constipation	1900	9.8	18620
cariprazine	schizophrenia ,psychosis,bipolar disease	1600	2.29	3664
levomilnacipran	depression	1600	4.34	6944
Tiagabine	epilepsy,seizure	1600	2.18	3488
Bromfenac	pain	1300	1.07	1391
eletriptan	Migraine,hedeache	1300	4.53	5889
rotigotine	Parkinson disease,restless legs syndrome,Willis-Ekbom Disease	1300	2.11	2743
dalfampridine	Multiple Sclerosis	1000	7.29	7290
frovatriptan	Migraine,hedeache	1000	3.47	3470
glatiramer acetate	Multiple Sclerosis	1000	20.14	20140
perampanel	epilepsy,seizure	1000	1.32	1320
rufinamide	seizures,epilepsy,Lennox-Gastaut syndrome	1000	2.57	2570
almotriptan	Migraine	880	17.24	15171.2
Tolcapone	Parkinson disease	880	0.01	8.8
interferon beta-1a	Multiple Sclerosis	720	19.82	14270.4
valproic	epilepsy,seizure,migraine,hedeache,bipolar disorder	720	1.61	1159.2
gabapentin enacarbil	epilepsy,seizure,shingles,pain,	590	1.49	879.1
Retigabine	epilepsy,seizure	590	4.16	2454.4
tasimelteon	non-24-hour sleep–wake disorder	590	1.15	678.5
Stiripentol	epilepsy,seizure,Dravet syndrome	390	2.8	1092
dexfenfluramine	obesity	320	0.05	16
botulinum toxin A	muscle stiffness,muscle spasms,overactive bladder,migraine,hedeache	170	1.46	248.2
peginterferon beta-1a	Multiple Sclerosis	110	9.11	1002.1
fentanyl sublingual	pain	70	3.82	267.4
diclofenac sodium Injection	pain,migraine,hedeache	30	0.58	17.4
Interferon Beta 1-A	Multiple Sclerosis	20	13.55	271

## Sheet: bingyahoo
Drug	Disease	Average monthly searches	Suggested bid	spend
gabapentin	epilepsy,seizure,shingles,pain,	86160	0.19	16370.4
meloxicam	inflammation	57960	0.09	5216.4
cyclobenzaprine	muscle spasms	50270	0.71	35691.7
hydrocodone	pain	46890	0.46	21569.4
oxycodone	pain	38390	1.55	59504.5
Clonazepam	seizures,panic disorder,anxiety	37860	0.28	10600.8
clonidine	attention deficit hyperactivity disorder,ADHD	31290	0.07	2190.3
Acetaminophen	pain	30020	0.59	17711.8
diclofenac	pain,migraine,hedeache	27850	0.16	4456
tizanidine	spasticity,muscle spasms	22370	0.13	2908.1
zolpidem	insomnia	21120	1.52	32102.4
fentanyl	pain	19720	0.34	6704.8
clopidogrel	stroke	18670	0.15	2800.5
lidocaine	anesthetic	16590	0.08	1327.2
topiramate	epilepsy,seizure,migraine,hedeache,	16520	1.04	17180.8
lamotrigine	epilepsy,seizure,bipolar disorder	16250	0.55	8937.5
donepezil	Alzheimer disease,dementia	15980	1.72	27485.6
methylphenidate	attention deficit hyperactivity disorder,ADHD,narcolepsy	15800	0.12	1896
naltrexone	drug abuse	13150	0.83	10914.5
indomethacin	pain	12920	0.07	904.4
warfarin	stroke	12910	1.51	19494.1
doxepin	depression,sleep disorder	12860	0.29	3729.4
morphine	pain	12100	0.86	10406
Levetiracetam	epilepsy,seizure	11990	0.7	8393
ketorolac	pain	10780	0.07	754.6
ropinirole	Parkinson disease,restless legs syndrome,Willis-Ekbom Disease	10520	0.12	1262.4
buprenorphine	pain	10480	0.4	4192
carbamazepine	epilepsy,seizure,neuropathic pain,pain,bipolar disorder	10140	0.41	4157.4
sumatriptan	Migraine,hedeache	9760	0.73	7124.8
hydromorphone	pain	9140	0.06	548.4
heparin	stroke	8980	0.07	628.6
oxcarbazepine	epilepsy,seizure,pain	8170	0.41	3349.7
Phenobarbital	epilepsy,seizure	8170	0.14	1143.8
Hydrocodone Acetaminophen	pain	7780	0.39	3034.2
aripiprazole	schizophrenia ,bipolar disorder,depression, Tourette syndrome,autism	7330	2.89	21183.7
apixaban	stroke	7080	2.02	14301.6
Pramipexole	Parkinson disease,restless legs syndrome	7050	0.07	493.5
Primidone	seizures,epilepsy	7010	0.07	490.7
guanfacine	attention deficit hyperactivity disorder,ADHD	6950	0.06	417
capsaicin	pain	6780	0.1	678
rifaximin	brain abcess	5660	0.61	3452.6
phenytoin	epilepsy,seizure	5630	0.11	619.3
tadalafil	erectile dysfunction	5410	1.74	9413.4
midazolam	muscle relaxant	5110	0.06	306.6
pregabalin	pain,fibromyalgia	4990	0.3	1497
memantine	Alzheimer disease,dementia	4770	4.09	19509.3
Acetazolamide	Benign Intracranial Hypertension	4600	0.2	920
zonisamide	epilepsy,seizure	4180	0.56	2340.8
eszopiclone	insomnia	3700	0.17	629
meropenem	brain abcess	3650	0	0
glycopyrrolate	vagal reflexes	3570	0.39	1392.3
rituximab	Multiple Sclerosis,Neuromyelitis Optica,Chronic Inflammatory Demyelinating Polyneuropathy,CIDP,	3510	0.91	3194.1
Rizatriptan	Migraine,hedeache	3410	1.51	5149.1
Piracetam	brain trauma	3230	0.22	710.6
Piracetam	brain damage	3230	0.22	710.6
zaleplon	insomnia	2720	0.08	217.6
galantamine	Alzheimer disease,dementia	2460	0.09	221.4
lacosamide	epilepsy,seizure	2300	0.07	161
rivastigmine	Alzheimer disease,dementia	2290	0.11	251.9
bupivacaine	pain,anesthesia	2000	0	0
alteplase	stroke	1760	0.95	1672
divalproex sodium	epilepsy,seizure,migraine,hedeache,	1750	0.09	157.5
dexmethylphenidate	attention deficit hyperactivity disorder,ADHD	1670	0.07	116.9
vardenafil	erectile dysfunction	1650	2.45	4042.5
Selegiline	Parkinson disease,depression	1640	0.19	311.6
atomoxetine	attention deficit hyperactivity disorder	1580	1.69	2670.2
tapentadol	pain	1400	0.05	70
ramelteon	insomnia	1250	0.06	75
paliperidone	schizophrenia ,schizoaffective disorder	1160	0.71	823.6
acetylsalicylic acid	pain,stroke	1120	0.19	212.8
entacapone	Parkinson disease	1070	0.21	224.7
botulinum toxin	muscle stiffness,muscle spasms,overactive bladder,migraine,hedeache	1050	0	0
botulinum toxin A	muscle stiffness,muscle spasms,overactive bladder,migraine,hedeache	1050	0	0
vilazodone	depression	1050	0	0
riluzole	Amiotrophic lateral sclerosis,ALS,Lou Gehrig's disease	940	0.48	451.2
armodafinil	sleepiness ,narcolepsy,sleep apnea	860	0.63	541.8
Naratriptan	Migraine,hedeache	860	0.91	782.6
clobazam	Lennox-Gastaut syndrome,epilepsy,seizure	850	0.08	68
Lisdexamfetamine	attention deficit hyperactivity disorder,ADHD,binge-eating disorder	830	0.06	49.8
nimodipine	brain hemorrage	830	0.26	215.8
suvorexant	insomnia	770	1.2	924
zolmitriptan	Migraine,hedeache	770	3.37	2594.9
Ethosuximide	epilepsy,seizure	640	0	0
Rasagiline	Parkinson disease	560	0.06	33.6
tetrabenazine	Huntington's disease,chorea	520	0	0
Dimethyl fumarate	Multiple Sclerosis	510	6.31	3218.1
apomorphine	Parkinson disease	500	0	0
natalizumab	Multiple Sclerosis	490	1.48	725.2
alemtuzumab	Multiple Sclerosis	480	1.07	513.6
Dihydroergotamine	Migraine,hedeache	480	0.08	38.4
Ticlopidine	stroke	470	0.05	23.5
fingolimod	Multiple Sclerosis	430	1.27	546.1
mitoxantrone	Multiple Sclerosis	430	1.65	709.5
tissue plasminogen activator	stroke	410	1.6	656
zinc acetate	Wilson disease	350	0.1	35
levomilnacipran	depression	310	3.96	1227.6
naloxegol	opioid-induced constipation	310	3.71	1150.1
valproic	epilepsy,seizure,migraine,hedeache,bipolar disorder	300	0.18	54
droxidopa	neurogenic orthostatic hypotension	290	0	0
glatiramer acetate	Multiple Sclerosis	290	6.23	1806.7
Tiagabine	epilepsy,seizure	290	0.78	226.2
vigabatrin	epilepsy,seizure,infantile spasms	290	0	0
Bromfenac	pain	280	0.18	50.4
dalfampridine	Multiple Sclerosis	260	1.51	392.6
rufinamide	seizures,epilepsy,Lennox-Gastaut syndrome	240	1.01	242.4
eletriptan	Migraine,hedeache	240	5.13	1231.2
rotigotine	Parkinson disease,restless legs syndrome,Willis-Ekbom Disease	240	0.07	16.8
cariprazine	schizophrenia ,psychosis,bipolar disease	220	0	0
Nitrazepam	insomnia	220	0	0
perampanel	epilepsy,seizure	210	0	0
Pemoline	attention deficit hyperactivity disorder,ADHD,fatigue	160	0	0
interferon beta-1a	Multiple Sclerosis	150	6.78	1017
almotriptan	Migraine	140	0.9	126
frovatriptan	Migraine,hedeache	140	1.36	190.4
eslicarbazepine	epilepsy,seizure	120	0	0
iodixanol	contrast agent	110	1.7	187
difluprednate	eye inflammation	100	0	0
ezogabine	epilepsy,seizure	90	0	0
gabapentin enacarbil	epilepsy,seizure,shingles,pain,	90	1.44	129.6
tasimelteon	non-24-hour sleep–wake disorder	90	0	0
Tolcapone	Parkinson disease	90	0	0
Retigabine	epilepsy,seizure	80	0	0
Stiripentol	epilepsy,seizure,Dravet syndrome	80	0	0
dexfenfluramine	obesity	60	0	0
fospropofol	anesthetic	30	0	0
caprylidene	Alzheimer disease,dementia	20	0	0
fentanyl sublingual	pain	20	0	0
Interferon Beta 1-A	Multiple Sclerosis	20	0	0
oxybate	narcolepsy	20	0	0
peginterferon beta-1a	Multiple Sclerosis	20	5.75	115
rimabotulinumtoxinB	cervical dystonia	20	0	0
carglumic acid	hepatic encephalopathy	10	0	0
diclofenac sodium Injection	pain,migraine,hedeache	10	0	0
Iontocaine	anesthetic	10	0	0
Samarium Sm 153 Lexidronam	pain,cancer	10	0	0
velaglucerase alfa	type 1 Gaucher disease,Gaucher disease	10	0	0
interferon beta-1a Pegylated	Multiple Sclerosis	0	0	0
Interferon beta-l b	Multiple Sclerosis	0	0	0
terfiflunomide	Multiple Sclerosis	0	0	0
